# Supplementary material for: Cross-clade simultaneous HIV drug resistance genotyping for reverse transcriptase, protease, and integrase inhibitor mutations by Illumina MiSeq
Source: PubMed Central journal article supplement (PMC4302432; doi:10.1186/s12977-014-0122-8), 2014-12-23

**Additional file 1:** 1.0% agarose gel image of RT-PCR products amplified with universal primers from 19 NIH HIV isolates.

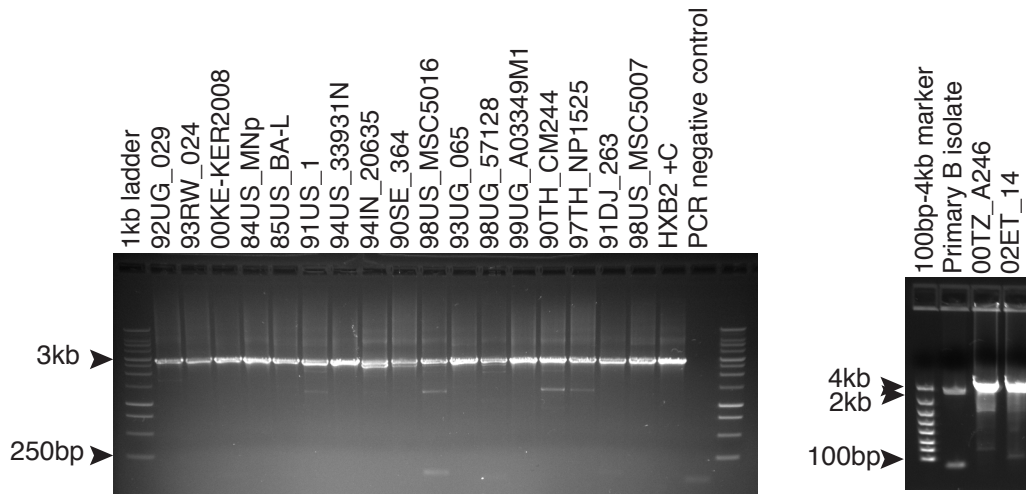

Supplement: 12977_2014_122_MOESM1_ESM.pdf [file 12977_2014_122_MOESM1_ESM.pdf]
