# Supplementary material for: Cross-clade simultaneous HIV drug resistance genotyping for reverse transcriptase, protease, and integrase inhibitor mutations by Illumina MiSeq
Source: PubMed Central journal article supplement (PMC4302432; doi:10.1186/s12977-014-0122-8), 2014-12-23
Supplement: 12977_2014_122_MOESM3_ESM.pdf [file 12977_2014_122_MOESM3_ESM.pdf]

**Additional file 3: Patient information from samples collected in the ALIVE cohort.**

| <b>Patient #</b> | <b>Visit</b> | <b>Before treatment/ after failure</b> | <b>Visit date</b> | <b>Viral load (copies/ml)</b> | <b>Single/ Nested PCR</b> | <b>Sequenced (Yes/No)</b> | <b>Drug naïve before first visit?</b> |
|------------------|--------------|----------------------------------------|-------------------|-------------------------------|---------------------------|---------------------------|---------------------------------------|
| <b>1</b>         | v04          | Before                                 | 7/99              | 38737                         | <b>Nested</b>             | Y                         | No                                    |
|                  | v06          | After                                  | 4/04              | 41855                         | Single                    | Y                         |                                       |
|                  | v12          | After                                  | 7/07              | 133000                        | Single                    | Y                         |                                       |
| <b>2</b>         | v13          | Before                                 | 6/98              | 19244                         | Single                    | Y                         | No                                    |
|                  | v15          | After                                  | 12/99             | 51978                         | Single                    | Y                         |                                       |
| <b>3</b>         | v22          | Before                                 | 9/03              | 157397                        | Single                    | Y                         | No                                    |
|                  | v24          | After                                  | 3/06              | 2550                          | Single                    | Y                         |                                       |
| <b>4</b>         | v22          | Before                                 | 8/98              | 3132                          | Single                    | Y                         | No                                    |
|                  | v24          | After                                  | 9/99              | 1070                          | Single                    | Y                         |                                       |
| <b>5</b>         | v18          | Before                                 | 12/00             | 305059                        | Single                    | Y                         | No                                    |
|                  | v20          | After                                  | 7/02              | 513564                        | Single                    | Y                         |                                       |
| <b>6</b>         | v18          | Before                                 | 4/08              | 281500                        | Single                    | Y                         | No                                    |
|                  | v20          | After                                  | 5/09              | 1110000                       | Single                    | Y                         |                                       |
| <b>7</b>         | v14          | Before                                 | 8/99              | 265878                        | Single                    | Y                         | No                                    |
|                  | v16          | After                                  | 8/00              | 337712                        | Single                    | Y                         |                                       |
| <b>8</b>         | v03          | Before                                 | 9/98              | 51852                         | Single                    | Y                         | No                                    |
|                  | v06          | After                                  | 6/00              | 944                           | <b>Did not amplify</b>    | N                         |                                       |
| <b>9</b>         | v30          | Before                                 | 5/07              | 421000                        | Single                    | Y                         | No                                    |
|                  | v32          | After                                  | 11/08             | 799                           | <b>Nested</b>             | Y                         |                                       |
|                  | v33          | After                                  | 5/09              | 22600                         | Single                    | Y                         |                                       |
| <b>10</b>        | v07          | Before                                 | 12/98             | 3721                          | Single                    | Y                         | No                                    |
|                  | v10          | After                                  | 7/08              | 40200                         | Single                    | Y                         |                                       |
| <b>11</b>        | v19          | Before                                 | 5/98              | 21402                         | Single                    | Y                         | No                                    |
|                  | v21          | After                                  | 4/99              | 16988                         | Single                    | Y                         |                                       |
| <b>12</b>        | v21          | Before                                 | 4/99              | 37804                         | <b>Did not amplify</b>    | N                         | No                                    |
|                  | v25          | After                                  | 5/01              | 4231                          | Single                    | Y                         |                                       |
| <b>13</b>        | v01          | Before                                 | 7/98              | 30172                         | Single                    | Y                         | Yes                                   |
|                  | v04          | After                                  | 5/00              | 32789                         | Single                    | Y                         |                                       |
| <b>14</b>        | v19          | Before                                 | 2/99              | 20558                         | Single                    | Y                         | No                                    |
|                  | v21          | After                                  | 6/00              | 118870                        | Single                    | Y                         |                                       |
| <b>15</b>        | v16          | Before                                 | 3/05              | 3200                          | Single                    | Y                         | No                                    |
|                  | v18          | After                                  | 12/06             | 480000                        | Single                    | Y                         |                                       |
| <b>16</b>        | v09          | Before                                 | 4/03              | 357227                        | Single                    | Y                         | No                                    |
|                  | v11          | After                                  | 3/04              | 43535                         | Single                    | Y                         |                                       |
| <b>17</b>        | v11          | Before                                 | 8/07              | 28900                         | Single                    | Y                         | No                                    |
|                  | v13          | After                                  | 10/08             | 66200                         | Single                    | Y                         |                                       |
| <b>18</b>        | s01          | Before                                 | 3/06              | 69700                         | Single                    | Y                         | Yes                                   |
|                  | v06          | After                                  | 8/09              | 41000                         | Single                    | Y                         |                                       |
| <b>19</b>        | v02          | Before                                 | 11/07             | 3750                          | <b>Nested</b>             | Y                         | Yes                                   |
|                  | v04          | After                                  | 10/08             | 206000                        | Single                    | Y                         |                                       |
| <b>20</b>        | v08          | Before                                 | 12/03             | 1604                          | <b>Nested</b>             | Y                         | Yes                                   |
|                  | v10          | After                                  | 2/06              | 934                           | <b>Nested</b>             | Y                         |                                       |
| <b>21</b>        | v04          | Before                                 | 9/97              | 11264                         | Single                    | Y                         | No                                    |

|           |     |        |       |        |                                         |   |     |
|-----------|-----|--------|-------|--------|-----------------------------------------|---|-----|
|           | v12 | After  | 8/04  | 1166   | <b>Nested</b>                           | Y |     |
| <b>22</b> | v08 | Before | 8/99  | 103077 | Single                                  | Y | Yes |
|           | v10 | After  | 2/01  | 6869   | Single                                  | Y |     |
| <b>23</b> | v04 | Before | 10/99 | 5689   | Single                                  | Y | No  |
|           | v07 | After  | 4/03  | 66260  | Single                                  | Y |     |
|           |     | After  |       |        | <b>Nested-<br/>*sequence<br/>failed</b> | N |     |
|           | v15 |        | 3/07  | 1190   |                                         |   |     |
|           | v17 | After  | 1/09  | 16200  | Single                                  | Y |     |
| <b>24</b> | v03 | Before | 12/99 | 17206  | Single                                  | Y | No  |
|           | v05 | After  | 2/01  | 5540   | Single                                  | Y |     |
| <b>25</b> | v11 | Before | 12/05 | 35000  | Single                                  | Y | No  |
|           | v14 | After  | 6/07  | 25200  | Single                                  | Y |     |
| <b>26</b> | v04 | Before | 11/99 | 187807 | Single                                  | Y | No  |
|           | v06 | After  | 12/00 | 456974 | Single                                  | Y |     |
| <b>27</b> | v02 | Before | 3/99  | 17281  | <b>Nested</b>                           | Y | Yes |
|           | v05 | After  | 9/00  | 8100   | Single                                  | Y |     |
|           |     | Before |       |        | <b>Nested-<br/>*sequence<br/>failed</b> | N | No  |
| <b>28</b> | v12 |        | 8/04  | 4345   |                                         |   |     |
|           | v14 | After  | 8/05  | 181000 | Single                                  | Y |     |
| <b>29</b> | v05 | Before | 8/08  | 1350   | <b>Nested</b>                           | Y | No  |
|           | v07 | After  | 10/09 | 909    | <b>Nested</b>                           | Y |     |
