# Supplementary material for: Cross-clade simultaneous HIV drug resistance genotyping for reverse transcriptase, protease, and integrase inhibitor mutations by Illumina MiSeq
Source: PubMed Central journal article supplement (PMC4302432; doi:10.1186/s12977-014-0122-8), 2014-12-23
Supplement: 12977_2014_122_MOESM5_ESM.pdf [file 12977_2014_122_MOESM5_ESM.pdf]

**Additional file 5: External and nested primers used to RT-PCR amplify HIV.**

| <b>Primer description</b> | <b>Primer name</b> | <b>Primer sequence</b>        |
|---------------------------|--------------------|-------------------------------|
| External Forward          | HIV737-F           | 5'-GCG RCT GGT GAG TAC GCC    |
| External Reverse          | HIV5578-R          | 5'-TCT TCY GGG GCT TGT TCC    |
| Nested Forward            | HIV2252-F          | 5'-CCC TCA RAT CAC TCT TTG GC |
| Nested Reverse            | HIV5073-R          | 5'-CCA CAC AAT CAT CAC CTG CC |
